# Supplementary material
Source: PubMed Central journal article supplement (PMC3882317)
Supplement: NIHMS540356-supplement-02.pdf [file NIHMS540356-supplement-02.pdf]

**Table S1. List of high-confidence interactors identified by affinity purification and mass spectrometry analysis. Related to Figure 1**

| <b>Protein name</b> | <b>Accession number</b> | <b>Molecular weight (kDa)</b> |
|---------------------|-------------------------|-------------------------------|
| NPM1                | P06748                  | 32                            |
| SET                 | Q01105                  | 33                            |
| PPM1G/PP2C $\gamma$ | O15355                  | 59                            |
| hnRNP-F             | P52597                  | 46                            |
| MePCE/BCDIN3        | Q7L2J0                  | 74                            |
| DDX21               | Q9NR30                  | 87                            |
| Sart3/Tip110        | Q15020                  | 110                           |
| DHX57               | Q6P158                  | 155                           |

## SUPPLEMENTAL EXPERIMENTAL PROCEDURES

### Materials

5,6-dichloro-1- $\beta$ -ribofuranosylbenzimidazole (DRB) (Sigma, D1916) was used at a final concentration of 100  $\mu$ M for 4 hrs. TNF- $\alpha$  (Sigma, T6674) was used at final concentration of 50 ng/ml for 1 hr.

### Cell culture and treatments

For the heat shock experiment, HeLa cells were heat shocked at 42°C for 2 hrs. To induce the inflammatory pathway, HeLa cells were treated with TNF- $\alpha$  (50 ng/ml) for 1 hr.

### RNAi and rescue assay

For the rescue assay (**Figure S5**), HeLa cells were transfected with 100 ng of an empty pcDNA4/TO (-) or pcDNA4/TO-PPM1G:S (PPM1G) plasmid DNA using PolyJet (SignaGen). One day post-transfection, cells were re-transfected with the indicated siRNAs. Two days post-siRNA transfection, cells were induced with TNF- $\alpha$  and used for RNA extraction and gene expression analysis by RT-qPCR and Western Blot.

### UV crosslinking of RNA-protein complexes *in vivo*

293T cells were seeded at  $2 \times 10^6$  cells into a 10-cm<sup>2</sup> plate and transfected with 5  $\mu$ g of a Strep-tagged Tat plasmid 24 hrs post seeding. For the experiment in **Figure S1A**, cells were irradiated with 125 mJ/cm<sup>2</sup> using a Spectrolinker XL-1500 UV crosslinker and harvested and lysed using denaturing lysis buffer (150 mM NaCl, 20 mM Tris-HCl pH = 7.0, 5% Glycerol, 1.5 mM MgCl<sub>2</sub>, 1 mM DTT, 1% NP-40, 0.25% Sodium Deoxycholate and 0.1 % SDS) and sonicated using the Bioruptor water bath Sonicator (Diagenode) with 8 cycles (30 sec on 30 sec off). Tat complexes

were affinity purified using Strep-tactin Superflow Resin (IBA Life Sciences) and washed using denaturing washing buffer (250 mM NaCl, 20 mM Tris-HCl pH = 7.0, 5% Glycerol, 1.5 mM MgCl<sub>2</sub>, 1 mM DTT, 0.05% NP-40, 0.1 % Sodium Deoxycholate, 0.1 % SDS). Co-immunoprecipitating RNAs were extracted using Proteinase K digestion [0.5 mg/mL Proteinase K, 20mM Tris-HCl pH = 7.0, 5 mM EDTA, 0.5% SDS, 300 pg/μl *in vitro* transcribed β-globin RNA (used as precipitation control, PC)] (Conrad, 2008) followed by Phenol:Chloroform:Isoamyl alcohol (25:24:1) extraction and ethanol precipitation. The immunoprecipitated material was analyzed by Northern blot using a 7SK probe encompassing stem-loop I made with primers P15 and P16 (**Table S4**) and labeled using a PCR DIG DNA labeling kit (Roche).

**Table S2. Plasmids used in this study**

| <b>Gene</b> | <b>Vector / Tag</b> | <b>Restriction sites</b> |
|-------------|---------------------|--------------------------|
| Tat         | pcDNA-4TO / Strep   | BamHI - XhoI             |
| Tat         | pcDNA-4TO / Flag    | BamHI - XhoI             |
| Larp7       | pcDNA-4TO / Strep   | BamHI - XhoI             |
| Larp7       | pcDNA-4TO / Flag    | BamHI - XhoI             |
| Sart3       | pcDNA-4TO / Strep   | HindIII - XhoI           |
| Sart3       | pcDNA-4TO / Flag    | HindIII - XhoI           |
| CycT1       | pcDNA-4TO / Strep   | HindIII - EcoRI          |
| CycT1       | pcDNA-4TO / Flag    | HindIII - EcoRI          |
| Cdk9        | pcDNA-4TO / Strep   | HindIII - XhoI           |
| Cdk9        | pcDNA-4TO / Flag    | HindIII - XhoI           |
| MePCE       | pcDNA-4TO / Strep   | HindIII - XhoI           |
| MePCE       | pcDNA-4TO / Flag    | HindIII - XhoI           |
| DDX21       | pcDNA-4TO / Strep   | BamHI - XhoI             |
| DDX21       | pcDNA-4TO / Flag    | BamHI - XhoI             |
| NPM1        | pcDNA-4TO / Strep   | BamHI - XhoI             |
| NPM1        | pcDNA-4TO / Flag    | BamHI - XhoI             |
| hnRNP-F     | pcDNA-4TO / Strep   | BamHI - XhoI             |
| hnRNP-F     | pcDNA-4TO / Flag    | BamHI - XhoI             |
| SET         | pcDNA-4TO / Flag    | NotI - XhoI              |
| GFP         | pcDNA-4TO / Strep   | BamHI - XhoI             |
| GFP         | pcDNA-4TO / Flag    | XhoI - ApaI              |
| PPM1G       | pcDNA-4TO / Strep   | BamHI - NotI             |
| PPM1G       | pcDNA-4TO / Flag    | BamHI - NotI             |

**Table S3. siRNAs used in RNAi assays**

| <b>Gene</b>      | <b>Flexitube siRNA product name</b> | <b>Catalog number</b> |
|------------------|-------------------------------------|-----------------------|
| Cdk9             | Hs_CDK9_5                           | SI00605066            |
| MePCE            | Hs_BCDIN3_1                         | SI02778265            |
| hnRNP-F          | Hs_HNRPF_1                          | SI00300461            |
| DHX57            | Hs_DHX57_5                          | SI02757839            |
| NPM1             | Hs_NPM1_1                           | SI00300979            |
| PPM1G            | Hs_PPM1G_6                          | SI02658684            |
| PPM1G*           | Hs_PPM1G_10                         | SI05016627            |
| PPM1G*           | Hs_PPM1G_11                         | SI05016634            |
| PPM1A            | HS_PPM1A_5                          | SI02659258            |
| SLC25A5          | Hs_SLC25A5_5                        | SI02654358            |
| CycT1            | Hs_CCNT1_1                          | SI00024073            |
| Larp7            | Hs_HDCMA18P_2                       | SI00434980            |
| SET              | Hs_SET_5                            | SI03021291            |
| DDX21            | Hs_DDX21_7                          | SI04311412            |
| Sart3            | Hs_SART3_7                          | SI04357304            |
| RelA             | Hs_RELA_5                           | SI00301672            |
| Negative control | AllStars Negative Control           | SI1027280             |

\* siRNA oligos used in rescue experiments because they target the 3' non-coding region.

**Table S4. DNA oligonucleotides used in this study**

| <b>Gene</b>     | <b>Primer number/Sequence (5'–3')</b>                                       | <b>Purpose / Assay</b>                    |
|-----------------|-----------------------------------------------------------------------------|-------------------------------------------|
| <b>MePCE</b>    | <b>507/TGAAGCCAGAGCAGTTCAGTTCCTA</b><br><b>508/TACACAGGACGCTGGAAGCCTTTA</b> | RNAi validation                           |
| <b>Larp7</b>    | <b>511/TCCGGGATACTTTGGCAGCAATCT</b><br><b>512/AGGATCTCGAGTTTCCAGCAGTGT</b>  | RNAi validation                           |
| <b>Cdk9</b>     | <b>517/GTGTTTCGACTTCTGCGAGCATGAC</b><br><b>518/CTATGCAGGATCTTGTCTGTGG</b>   | RNAi validation                           |
| <b>SLC25A5</b>  | <b>519/GCAGCTGATGTGGGTAAAGCTGG</b><br><b>520/CCGGAAGCATTCCCTTTGCAGT</b>     | RNAi validation                           |
| <b>NPM1</b>     | <b>525/GTTGTGAACTAAAGGCCGACAAAG</b><br><b>526/TGTGCAACTCATCCTTTGCACCAG</b>  | RNAi validation                           |
| <b>hnRNP-F</b>  | <b>527/TGTATTGGTCTCCTGCTCCTAGA</b><br><b>528/AGGACTGGTTTCTGTTGCTACC</b>     | RNAi validation                           |
| <b>DDX21</b>    | <b>531/CTGGGTGTTTGCTTTGATGTACC</b><br><b>532/AGTTCTGGTTGCTCTGTGG</b>        | RNAi validation                           |
| <b>DHX57</b>    | <b>537/CCGCTGTTTGGATCCTGCTCT</b><br><b>538/GCTGCCATCCCTTATACGCTTG</b>       | RNAi validation                           |
| <b>SET</b>      | <b>539/AATATAACAACTCCGCCAACCC</b><br><b>540/CTGGTCAAATAATGCAGTGCCTC</b>     | RNAi validation                           |
| <b>PPM1G</b>    | <b>543/AAAATGGCAACAGCGACAAG</b><br><b>544/CACCTCATACCCACTGCTA</b>           | RNAi validation                           |
| <b>Sart3</b>    | <b>549/CTTTACTCGTGCCCTTGGAGTAT</b><br><b>550/CCGAGCTTTCTGCATGTTATTG</b>     | RNAi validation                           |
| <b>CycT1</b>    | <b>551/GCAGACTTTAGGCTTTGAACTAAC</b><br><b>552/TACTGCAGGCTAAATGTGGT</b>      | RNAi validation                           |
| <b>7SK RNA</b>  | <b>15/GGATGTGAGGGCGATCTG</b><br><b>16/GGAGCGGTGAGGGAGGAAG</b>               | RIP assay, Northern blot                  |
| <b>U6 snRNA</b> | <b>9/CTCGCTTCGGCAGCACATATAC</b><br><b>10/GGAACGCTTCACGAATTTGCGTG</b>        | RIP assay                                 |
| <b>β-actin</b>  | <b>389/CCCCCGGGCCGTCTTCCCCTC</b><br><b>390/TGAGGATGCCTCTCTTGCTCTG</b>       | Internal control RNAi                     |
| <b>gapdh</b>    | <b>239/CCCTGTGCTCAACCAGT</b><br><b>240/CTCACCTTGACACAAGCC</b>               | Internal control RNAi                     |
| <b>c-Myc</b>    | <b>860/ACAGCTACGGAActCTTGTGCGTA</b><br><b>861/CAGCCAAGTTGTGAGTTGCATT</b>    | Internal control RNAi                     |
| <b>Rpl19</b>    | <b>354/ATCGATCGCCACATGTATCA</b><br><b>355/GCGTGCTTCCTTGGTCTTAG</b>          | Internal control RNAi                     |
| <b>Hsp90</b>    | <b>838/CCTTCTATTTGTCCCACG</b><br><b>839/ATCCTCCGAGTCTACCAC</b>              | Heat shock response                       |
| <b>Hsp70</b>    | <b>842/ACCCGCATCCCCAAGGTGCAG</b><br><b>843/TCAGGGCAGTCATCACGCCTC</b>        | Heat shock response                       |
| <b>IL-8</b>     | <b>245/GGGCCATCAGTTGCAAATC</b><br><b>246/TTCTTCCGGTGGTTTCTTC</b>            | Inflammatory response<br>ChIP (Promoter)  |
| <b>IL-8</b>     | <b>282/GCCATAAAGTCAAATTTAGCTGGAA</b><br><b>283/GTGCTTCCACATGTCTCACA</b>     | Inflammatory response<br>ChIP (Gene body) |
| <b>IκBα</b>     | <b>255/GATCCGCCAGGTGAAGGG</b><br><b>256/GCAATTTCTGGCTGGTTGG</b>             | Inflammatory response                     |

**Table S5. Antibodies used in IF, IP, ChIP and Western blot assays**

| <b>Protein/Tag</b>             | <b>Source (Company)</b>                     | <b>Catalog Number</b> |
|--------------------------------|---------------------------------------------|-----------------------|
| CycT1                          | Santa Cruz Biotechnologies                  | sc-10750              |
| Cdk9                           | Santa Cruz Biotechnologies                  | sc-484                |
| Phospho-Cdk9 (Thr186)          | Cell Signaling                              | 2549                  |
| STREP-Tag II                   | Novagen                                     | 71591                 |
| FLAG M2                        | Sigma                                       | F1804                 |
| MePCE/BCDIN3 (N-17)            | Santa Cruz Biotechnologies                  | sc-82542              |
| Larp7/PIP7S                    | Sigma                                       | AV40847               |
| Hexim1                         | Abcam                                       | ab25388               |
| RNA Polymerase II CTD          | Active Motif                                | 102660                |
| RNA Polymerase II S5P-CTD      | Abcam                                       | ab5131                |
| RNA Polymerase II S2P-CTD      | Abcam                                       | ab5095                |
| Normal Rabbit IgG              | Santa Cruz Biotechnologies                  | sc-2027               |
| $\beta$ -actin (C4)            | Santa Cruz Biotechnologies                  | sc-47778              |
| PPM1G/PP2C $\gamma$            | Santa Cruz Biotechnologies                  | sc-136320             |
| PPM1G/PP2C $\gamma$            | Abcam                                       | ab70794               |
| SART3 (C3)                     | GeneTex                                     | GTX107684             |
| p65/NF- $\kappa$ B/RelA (C-20) | Santa Cruz Biotechnologies                  | sc-372X               |
| HIV-1 p24 (AG3.0)              | AIDS Research and Reference Reagent Program | 4121                  |
| GST                            | Santa Cruz Biotechnologies                  | sc-33613              |

## **SUPPLEMENTAL REFERENCES**

Conrad, N.K. (2008). Chapter 15. Co-immunoprecipitation techniques for assessing RNA-protein interactions in vivo. *Methods Enzymol.*, 317-342.

Li, Q., Price, J.P., Byers, S.A., Cheng, D., Peng, J., and Price, D.H. (2005). Analysis of the large inactive P-TEFb complex indicates that it contains one 7SK molecule, a dimer of HEXIM1 or HEXIM2, and two P-TEFb molecules containing Cdk9 phosphorylated at threonine 186. *J. Biol. Chem.* *280*, 28819-28826.
